# Supplementary material
Source: MDPI journal article supplement (https://www.mdpi.com/2073-4352/10/9/793)

# checkCIF/PLATON report

Structure factors have been supplied for datablock(s) yellow\_ch3cn\_293

THIS REPORT IS FOR GUIDANCE ONLY. IF USED AS PART OF A REVIEW PROCEDURE FOR PUBLICATION, IT SHOULD NOT REPLACE THE EXPERTISE OF AN EXPERIENCED CRYSTALLOGRAPHIC REFEREE.

No syntax errors found.      CIF dictionary      Interpreting this report

## Datablock: yellow\_ch3cn\_293

---

Bond precision:    C-C = 0.0151 A

Wavelength=0.71073

Cell:                    a=43.047(14)                    b=14.742(6)                    c=23.161(6)

                          alpha=90                    beta=90                    gamma=90

Temperature:            293 K

|                | Calculated                              | Reported                                |
|----------------|-----------------------------------------|-----------------------------------------|
| Volume         | 14698(9)                                | 14699(8)                                |
| Space group    | F d d 2                                 | F d d 2                                 |
| Hall group     | F 2 -2d                                 | F 2 -2d                                 |
| Moiety formula | C62 H58 Cl8 Fe N10, 2(B F4), 2(C2 H3 N) | C62 H58 Cl8 Fe N10, 2(B F4), 2(C2 H3 N) |
| Sum formula    | C66 H64 B2 Cl8 F8 Fe N12                | C66 H64 B2 Cl8 F8 Fe N12                |
| Mr             | 1538.36                                 | 1538.36                                 |
| Dx,g cm-3      | 1.390                                   | 1.390                                   |
| Z              | 8                                       | 8                                       |
| Mu (mm-1)      | 0.565                                   | 0.565                                   |
| F000           | 6304.0                                  | 6304.0                                  |
| F000'          | 6318.66                                 |                                         |
| h,k,lmax       | 54,18,29                                | 54,18,29                                |
| Nref           | 8030[ 4117]                             | 8029                                    |
| Tmin,Tmax      | 0.873,0.893                             | 0.453,0.746                             |
| Tmin'          | 0.868                                   |                                         |

Correction method= # Reported T Limits: Tmin=0.453 Tmax=0.746

AbsCorr = MULTI-SCAN

Data completeness= 1.95/1.00

Theta(max)= 26.999

R(reflections)= 0.0656( 3666)

wR2(reflections)= 0.1776( 8029)

S = 0.939

Npar= 474

---

The following ALERTS were generated. Each ALERT has the format

**test-name\_ALERT\_alert-type\_alert-level.**

Click on the hyperlinks for more details of the test.

---

### Alert level B

RINTA01\_ALERT\_3\_B The value of Rint is greater than 0.18

Rint given 0.216

PLAT341\_ALERT\_3\_B Low Bond Precision on C-C Bonds ..... 0.01512 Ang.

---

### Alert level C

STRVA01\_ALERT\_4\_C Flack test results are ambiguous.

From the CIF: `_refine_ls_abs_structure_Flack` 0.590

From the CIF: `_refine_ls_abs_structure_Flack_su` 0.050

PLAT026\_ALERT\_3\_C Ratio Observed / Unique Reflections (too) Low .. 46% Check  
PLAT220\_ALERT\_2\_C NonSolvent Resd 1 C Ueq(max)/Ueq(min) Range 3.6 Ratio  
PLAT234\_ALERT\_4\_C Large Hirshfeld Difference C24 --C27' . 0.23 Ang.  
PLAT234\_ALERT\_4\_C Large Hirshfeld Difference C24A --C27A . 0.19 Ang.  
PLAT241\_ALERT\_2\_C High 'MainMol' Ueq as Compared to Neighbors of C15 Check  
PLAT242\_ALERT\_2\_C Low 'MainMol' Ueq as Compared to Neighbors of C24 Check  
PLAT242\_ALERT\_2\_C Low 'MainMol' Ueq as Compared to Neighbors of C24A Check  
PLAT244\_ALERT\_4\_C Low 'Solvent' Ueq as Compared to Neighbors of C1S Check  
PLAT260\_ALERT\_2\_C Large Average Ueq of Residue Including F1 0.156 Check  
PLAT260\_ALERT\_2\_C Large Average Ueq of Residue Including N1S 0.181 Check  
PLAT601\_ALERT\_2\_C Unit Cell Contains Solvent Accessible VOIDS of . 34 Ang\*\*3  
PLAT907\_ALERT\_2\_C Flack x > 0.5, Structure Needs to be Inverted? . 0.59 Check

---

### Alert level G

PLAT003\_ALERT\_2\_G Number of Uiso or Uij Restrained non-H Atoms ... 9 Report  
PLAT020\_ALERT\_3\_G The Value of Rint is Greater Than 0.12 ..... 0.216 Report  
PLAT171\_ALERT\_4\_G The CIF-Embedded .res File Contains EADP Records 6 Report  
PLAT186\_ALERT\_4\_G The CIF-Embedded .res File Contains ISOR Records 7 Report  
PLAT199\_ALERT\_1\_G Reported `_cell_measurement_temperature` .... (K) 293 Check  
PLAT200\_ALERT\_1\_G Reported `_diffn_ambient_temperature` .... (K) 293 Check  
PLAT244\_ALERT\_4\_G Low 'Solvent' Ueq as Compared to Neighbors of B1 Check  
PLAT301\_ALERT\_3\_G Main Residue Disorder .....(Resd 1 ) 15% Note  
PLAT412\_ALERT\_2\_G Short Intra XH3 .. XHn H2 ..H25A . 2.08 Ang.  
x,y,z = 1\_555 Check  
PLAT412\_ALERT\_2\_G Short Intra XH3 .. XHn H2A ..H25G . 2.14 Ang.  
x,y,z = 1\_555 Check  
PLAT720\_ALERT\_4\_G Number of Unusual/Non-Standard Labels ..... 3 Note  
PLAT721\_ALERT\_1\_G Bond Calc 0.97000, Rep 0.96000 Dev... 0.01 Ang.  
C26A -H26F 1.555 1.555 ..... # 84 Check  
PLAT721\_ALERT\_1\_G Bond Calc 0.97000, Rep 0.96000 Dev... 0.01 Ang.  
C27A -H27D 1.555 1.555 ..... # 88 Check  
PLAT721\_ALERT\_1\_G Bond Calc 0.97000, Rep 0.96000 Dev... 0.01 Ang.  
C26" -H26I 1.555 1.555 ..... # 102 Check  
PLAT722\_ALERT\_1\_G Angle Calc 108.00, Rep 109.50 Dev... 1.50 Degree  
H27D -C27A -H27E 1.555 1.555 1.555 # 163 Check  
PLAT773\_ALERT\_2\_G Check long C-C Bond in CIF: C24 --C25' 1.73 Ang.  
PLAT794\_ALERT\_5\_G Tentative Bond Valency for Fe1 (II) . 2.15 Info  
PLAT860\_ALERT\_3\_G Number of Least-Squares Restraints ..... 55 Note  
PLAT870\_ALERT\_4\_G ALERTS Related to Twinning Effects Suppressed .. ! Info  
PLAT883\_ALERT\_1\_G No Info/Value for `_atom_sites_solution_primary` . Please Do !  
PLAT910\_ALERT\_3\_G Missing # of FCF Reflection(s) Below Theta(Min). 1 Note  
PLAT933\_ALERT\_2\_G Number of OMIT Records in Embedded .res File ... 2 Note  
PLAT960\_ALERT\_3\_G Number of Intensities with I < - 2\*sig(I) ... 1 Check

---

0 **ALERT level A** = Most likely a serious problem - resolve or explain  
2 **ALERT level B** = A potentially serious problem, consider carefully  
13 **ALERT level C** = Check. Ensure it is not caused by an omission or oversight  
23 **ALERT level G** = General information/check it is not something unexpected

7 ALERT type 1 CIF construction/syntax error, inconsistent or missing data  
13 ALERT type 2 Indicator that the structure model may be wrong or deficient  
8 ALERT type 3 Indicator that the structure quality may be low  
9 ALERT type 4 Improvement, methodology, query or suggestion  
1 ALERT type 5 Informative message, check

---

---

It is advisable to attempt to resolve as many as possible of the alerts in all categories. Often the minor alerts point to easily fixed oversights, errors and omissions in your CIF or refinement strategy, so attention to these fine details can be worthwhile. In order to resolve some of the more serious problems it may be necessary to carry out additional measurements or structure refinements. However, the purpose of your study may justify the reported deviations and the more serious of these should normally be commented upon in the discussion or experimental section of a paper or in the "special\_details" fields of the CIF. checkCIF was carefully designed to identify outliers and unusual parameters, but every test has its limitations and alerts that are not important in a particular case may appear. Conversely, the absence of alerts does not guarantee there are no aspects of the results needing attention. It is up to the individual to critically assess their own results and, if necessary, seek expert advice.

### **Publication of your CIF in IUCr journals**

A basic structural check has been run on your CIF. These basic checks will be run on all CIFs submitted for publication in IUCr journals (*Acta Crystallographica*, *Journal of Applied Crystallography*, *Journal of Synchrotron Radiation*); however, if you intend to submit to *Acta Crystallographica Section C* or *E* or *IUCrData*, you should make sure that full publication checks are run on the final version of your CIF prior to submission.

### **Publication of your CIF in other journals**

Please refer to the *Notes for Authors* of the relevant journal for any special instructions relating to CIF submission.

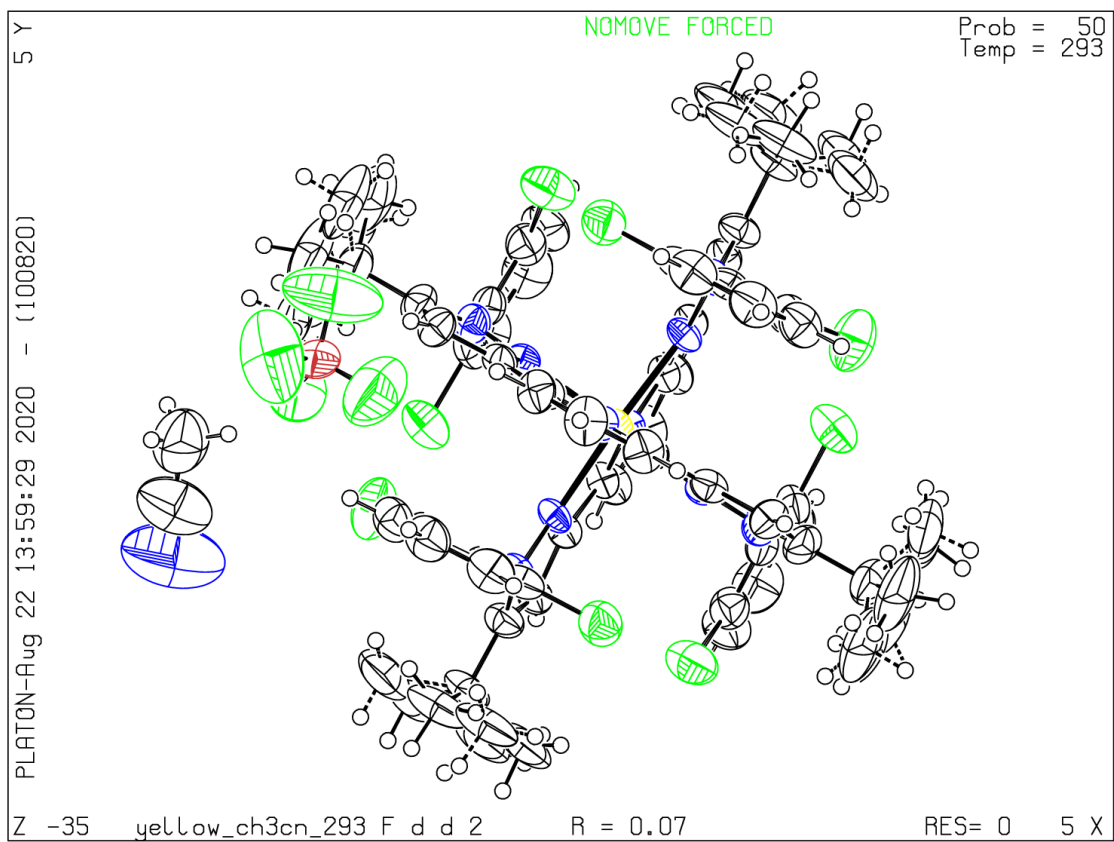

Supplement: s1 [file s1]
