# Supplementary material
Source: MDPI journal article supplement (https://www.mdpi.com/2073-4352/10/9/793)
Supplement: s1 [file s1]

# checkCIF/PLATON report

Structure factors have been supplied for datablock(s) Red\_CH3CN\_120

THIS REPORT IS FOR GUIDANCE ONLY. IF USED AS PART OF A REVIEW PROCEDURE FOR PUBLICATION, IT SHOULD NOT REPLACE THE EXPERTISE OF AN EXPERIENCED CRYSTALLOGRAPHIC REFEREE.

No syntax errors found.      CIF dictionary      Interpreting this report

## Datablock: Red\_CH3CN\_120

---

Bond precision:    C-C = 0.0240 Å                      Wavelength=0.71073

Cell:                      a=45.272(7)              b=13.335(2)              c=24.665(4)  
                            alpha=90              beta=90              gamma=90  
Temperature:              120 K

|                        | Calculated                              | Reported                                   |
|------------------------|-----------------------------------------|--------------------------------------------|
| Volume                 | 14890(4)                                | 14890(4)                                   |
| Space group            | P b c n                                 | P b c n                                    |
| Hall group             | -P 2n 2ab                               | -P 2n 2ab                                  |
| Moiety formula         | C62 H58 Cl8 Fe N10, 2(B F4), 2(C2 H3 N) | 2(C62 H58 Cl8 Fe N10), 4(B F4), 4(C2 H3 N) |
| Sum formula            | C66 H64 B2 Cl8 F8 Fe N12                | Cl33 H128 B4 Cl16 F16 Fe2 N24              |
| Mr                     | 1538.37                                 | 3088.73                                    |
| Dx, g cm <sup>-3</sup> | 1.372                                   | 1.378                                      |
| Z                      | 8                                       | 4                                          |
| Mu (mm <sup>-1</sup> ) | 0.557                                   | 0.558                                      |
| F000                   | 6304.0                                  | 6328.0                                     |
| F000'                  | 6318.66                                 |                                            |
| h,k,lmax               | 55,16,30                                | 55,16,30                                   |
| Nref                   | 14647                                   | 14645                                      |
| Tmin,Tmax              | 0.935,0.946                             | 0.642,0.746                                |
| Tmin'                  | 0.870                                   |                                            |

Correction method= # Reported T Limits: Tmin=0.642 Tmax=0.746  
AbsCorr = MULTI-SCAN

Data completeness= 1.000                      Theta(max)= 25.999

R(reflections)= 0.1504( 6631)              wR2(reflections)= 0.4839( 14645)

S = 1.067                      Npar= 938

---

The following ALERTS were generated. Each ALERT has the format

**test-name\_ALERT\_alert-type\_alert-level.**

Click on the hyperlinks for more details of the test.

---

 **Alert level A**

PLAT084\_ALERT\_3\_A High wR2 Value (i.e. > 0.25) ..... 0.48 Report

**Author Response: The crystals suffered from a severe disorder of the lattice solvent molecules and a low reflective power.**

---

 **Alert level B**

RINTA01\_ALERT\_3\_B The value of Rint is greater than 0.18  
Rint given 0.198

**Author Response: The crystals suffered from a severe disorder of the lattice solvent molecules and a low reflective power.**

PLAT020\_ALERT\_3\_B The Value of Rint is Greater Than 0.12 ..... 0.198 Report

**Author Response: The crystals suffered from a severe disorder of the lattice solvent molecules and a low reflective power.**

PLAT341\_ALERT\_3\_B Low Bond Precision on C-C Bonds ..... 0.02402 Ang.

**Author Response: The crystals suffered from a severe disorder of the lattice solvent molecules and a low reflective power.**

---

 **Alert level C**

|                   |                                                  |      |              |
|-------------------|--------------------------------------------------|------|--------------|
| PLAT026_ALERT_3_C | Ratio Observed / Unique Reflections (too) Low .. | 45%  | Check        |
| PLAT041_ALERT_1_C | Calc. and Reported SumFormula Strings Differ     |      | Please Check |
| PLAT043_ALERT_1_C | Calculated and Reported Mol. Weight Differ by .. | 6.00 | Check        |
| PLAT068_ALERT_1_C | Reported F000 Differs from Calcd (or Missing)... |      | Please Check |
| PLAT082_ALERT_2_C | High R1 Value .....                              | 0.15 | Report       |
| PLAT094_ALERT_2_C | Ratio of Maximum / Minimum Residual Density .... | 2.11 | Report       |
| PLAT213_ALERT_2_C | Atom C28 has ADP max/min Ratio .....             | 3.5  | prolat       |
| PLAT213_ALERT_2_C | Atom C30 has ADP max/min Ratio .....             | 3.5  | prolat       |
| PLAT213_ALERT_2_C | Atom C31 has ADP max/min Ratio .....             | 3.1  | prolat       |
| PLAT220_ALERT_2_C | NonSolvent Resd 1 C Ueq(max)/Ueq(min) Range      | 4.7  | Ratio        |
| PLAT222_ALERT_3_C | NonSolvent Resd 1 H Uiso(max)/Uiso(min) Range    | 5.2  | Ratio        |
| PLAT230_ALERT_2_C | Hirshfeld Test Diff for C1A --C2A .              | 5.2  | s.u.         |
| PLAT234_ALERT_4_C | Large Hirshfeld Difference Fe1 --N4 .            | 0.16 | Ang.         |
| PLAT234_ALERT_4_C | Large Hirshfeld Difference Cl1 --C13 .           | 0.16 | Ang.         |
| PLAT234_ALERT_4_C | Large Hirshfeld Difference Cl3 --C19 .           | 0.24 | Ang.         |
| PLAT234_ALERT_4_C | Large Hirshfeld Difference N1 --C4 .             | 0.16 | Ang.         |
| PLAT234_ALERT_4_C | Large Hirshfeld Difference N1A --C8A .           | 0.22 | Ang.         |
| PLAT234_ALERT_4_C | Large Hirshfeld Difference N5 --C18 .            | 0.16 | Ang.         |
| PLAT234_ALERT_4_C | Large Hirshfeld Difference C5A --C6A .           | 0.21 | Ang.         |
| PLAT234_ALERT_4_C | Large Hirshfeld Difference C6A --C7A .           | 0.17 | Ang.         |
| PLAT234_ALERT_4_C | Large Hirshfeld Difference C10 --C11 .           | 0.22 | Ang.         |
| PLAT234_ALERT_4_C | Large Hirshfeld Difference C16 --C17 .           | 0.17 | Ang.         |

|                   |                                                  |        |   |        |        |
|-------------------|--------------------------------------------------|--------|---|--------|--------|
| PLAT234_ALERT_4_C | Large Hirshfeld Difference C19A                  | --C20A | . | 0.20   | Ang.   |
| PLAT234_ALERT_4_C | Large Hirshfeld Difference C24A                  | --C26A | . | 0.22   | Ang.   |
| PLAT241_ALERT_2_C | High 'MainMol' Ueq as Compared to Neighbors of   |        |   | C6A    | Check  |
| PLAT241_ALERT_2_C | High 'MainMol' Ueq as Compared to Neighbors of   |        |   | C11    | Check  |
| PLAT241_ALERT_2_C | High 'MainMol' Ueq as Compared to Neighbors of   |        |   | C15    | Check  |
| PLAT241_ALERT_2_C | High 'MainMol' Ueq as Compared to Neighbors of   |        |   | C22    | Check  |
| PLAT242_ALERT_2_C | Low 'MainMol' Ueq as Compared to Neighbors of    |        |   | C18    | Check  |
| PLAT242_ALERT_2_C | Low 'MainMol' Ueq as Compared to Neighbors of    |        |   | C24A   | Check  |
| PLAT242_ALERT_2_C | Low 'MainMol' Ueq as Compared to Neighbors of    |        |   | C28    | Check  |
| PLAT242_ALERT_2_C | Low 'MainMol' Ueq as Compared to Neighbors of    |        |   | C28A   | Check  |
| PLAT250_ALERT_2_C | Large U3/U1 Ratio for Average U(i,j) Tensor ...  |        |   | 2.1    | Note   |
| PLAT260_ALERT_2_C | Large Average Ueq of Residue Including           | F1     |   | 0.179  | Check  |
| PLAT260_ALERT_2_C | Large Average Ueq of Residue Including           | F5     |   | 0.171  | Check  |
| PLAT260_ALERT_2_C | Large Average Ueq of Residue Including           | N1S    |   | 0.125  | Check  |
| PLAT260_ALERT_2_C | Large Average Ueq of Residue Including           | N2S    |   | 0.145  | Check  |
| PLAT260_ALERT_2_C | Large Average Ueq of Residue Including           | N3S    |   | 0.119  | Check  |
| PLAT260_ALERT_2_C | Large Average Ueq of Residue Including           | N4S    |   | 0.125  | Check  |
| PLAT334_ALERT_2_C | Small Aver. Benzene C-C Dist C18A                | -C23A  |   | 1.37   | Ang.   |
| PLAT360_ALERT_2_C | Short C(sp3)-C(sp3) Bond C28                     | - C30  | . | 1.43   | Ang.   |
| PLAT905_ALERT_3_C | Negative K value in the Analysis of Variance ... |        |   | -2.059 | Report |
| PLAT911_ALERT_3_C | Missing FCF Refl Between Thmin & STh/L=          | 0.600  |   | 3      | Report |
| PLAT918_ALERT_3_C | Reflection(s) with I(obs) much Smaller I(calc)   |        |   | 1      | Check  |
| PLAT939_ALERT_3_C | Large Value of Not (SHELXL) Weight Optimized S   |        |   | 27.20  | Check  |

## Alert level G

FORMU01\_ALERT\_1\_G There is a discrepancy between the atom counts in the  
 \_chemical\_formula\_sum and \_chemical\_formula\_moiety. This is  
 usually due to the moiety formula being in the wrong format.  
 Atom count from \_chemical\_formula\_sum: C133 H128 B4 Cl16 F16 Fe2 N24  
 Atom count from \_chemical\_formula\_moiety: C132 H128 B4 Cl16 F16 Fe2 N24

FORMU01\_ALERT\_2\_G There is a discrepancy between the atom counts in the  
 \_chemical\_formula\_sum and the formula from the \_atom\_site\* data.  
 Atom count from \_chemical\_formula\_sum: C133 H128 B4 Cl16 F16 Fe2 N24  
 Atom count from the \_atom\_site data: C132 H128 B4 Cl16 F16 Fe2 N24

CELLZ01\_ALERT\_1\_G Difference between formula and atom\_site contents detected.

CELLZ01\_ALERT\_1\_G ALERT: Large difference may be due to a  
 symmetry error - see SYMMG tests  
 From the CIF: \_cell\_formula\_units\_Z 4  
 From the CIF: \_chemical\_formula\_sum C133 H128 B4 Cl16 F16 Fe2 N24  
 TEST: Compare cell contents of formula and atom\_site data

| atom | Z*formula | cif sites | diff |
|------|-----------|-----------|------|
| C    | 532.00    | 528.00    | 4.00 |
| H    | 512.00    | 512.00    | 0.00 |
| B    | 16.00     | 16.00     | 0.00 |
| Cl   | 64.00     | 64.00     | 0.00 |
| F    | 64.00     | 64.00     | 0.00 |
| Fe   | 8.00      | 8.00      | 0.00 |
| N    | 96.00     | 96.00     | 0.00 |

PLAT002\_ALERT\_2\_G Number of Distance or Angle Restraints on AtSite 12 Note

PLAT003\_ALERT\_2\_G Number of Uiso or Uij Restrained non-H Atoms ... 16 Report

PLAT042\_ALERT\_1\_G Calc. and Reported MoietyFormula Strings Differ Please Check

PLAT045\_ALERT\_1\_G Calculated and Reported Z Differ by a Factor ... 2.00 Check

PLAT072\_ALERT\_2\_G SHELXL First Parameter in WGHT Unusually Large 0.19 Report

PLAT083\_ALERT\_2\_G SHELXL Second Parameter in WGHT Unusually Large 203.22 Why ?

PLAT171\_ALERT\_4\_G The CIF-Embedded .res File Contains EADP Records 6 Report

PLAT172\_ALERT\_4\_G The CIF-Embedded .res File Contains DFIX Records 16 Report

PLAT186\_ALERT\_4\_G The CIF-Embedded .res File Contains ISOR Records 10 Report

PLAT244\_ALERT\_4\_G Low 'Solvent' Ueq as Compared to Neighbors of B1 Check

PLAT244\_ALERT\_4\_G Low 'Solvent' Ueq as Compared to Neighbors of B2 Check

|                   |                                                |                |       |       |
|-------------------|------------------------------------------------|----------------|-------|-------|
| PLAT300_ALERT_4_G | Atom Site Occupancy of C29'                    | Constrained at | 0.5   | Check |
| PLAT300_ALERT_4_G | Atom Site Occupancy of C29A                    | Constrained at | 0.5   | Check |
| PLAT300_ALERT_4_G | Atom Site Occupancy of C30'                    | Constrained at | 0.5   | Check |
| PLAT300_ALERT_4_G | Atom Site Occupancy of C30A                    | Constrained at | 0.5   | Check |
| PLAT300_ALERT_4_G | Atom Site Occupancy of C31'                    | Constrained at | 0.5   | Check |
| PLAT300_ALERT_4_G | Atom Site Occupancy of C31A                    | Constrained at | 0.5   | Check |
| PLAT300_ALERT_4_G | Atom Site Occupancy of H29D                    | Constrained at | 0.5   | Check |
| PLAT300_ALERT_4_G | Atom Site Occupancy of H29E                    | Constrained at | 0.5   | Check |
| PLAT300_ALERT_4_G | Atom Site Occupancy of H29F                    | Constrained at | 0.5   | Check |
| PLAT300_ALERT_4_G | Atom Site Occupancy of H29G                    | Constrained at | 0.5   | Check |
| PLAT300_ALERT_4_G | Atom Site Occupancy of H29H                    | Constrained at | 0.5   | Check |
| PLAT300_ALERT_4_G | Atom Site Occupancy of H29I                    | Constrained at | 0.5   | Check |
| PLAT300_ALERT_4_G | Atom Site Occupancy of H30D                    | Constrained at | 0.5   | Check |
| PLAT300_ALERT_4_G | Atom Site Occupancy of H30E                    | Constrained at | 0.5   | Check |
| PLAT300_ALERT_4_G | Atom Site Occupancy of H30F                    | Constrained at | 0.5   | Check |
| PLAT300_ALERT_4_G | Atom Site Occupancy of H30G                    | Constrained at | 0.5   | Check |
| PLAT300_ALERT_4_G | Atom Site Occupancy of H30H                    | Constrained at | 0.5   | Check |
| PLAT300_ALERT_4_G | Atom Site Occupancy of H30I                    | Constrained at | 0.5   | Check |
| PLAT300_ALERT_4_G | Atom Site Occupancy of H31D                    | Constrained at | 0.5   | Check |
| PLAT300_ALERT_4_G | Atom Site Occupancy of H31E                    | Constrained at | 0.5   | Check |
| PLAT300_ALERT_4_G | Atom Site Occupancy of H31F                    | Constrained at | 0.5   | Check |
| PLAT300_ALERT_4_G | Atom Site Occupancy of H31G                    | Constrained at | 0.5   | Check |
| PLAT300_ALERT_4_G | Atom Site Occupancy of H31H                    | Constrained at | 0.5   | Check |
| PLAT300_ALERT_4_G | Atom Site Occupancy of H31I                    | Constrained at | 0.5   | Check |
| PLAT300_ALERT_4_G | Atom Site Occupancy of N1S                     | Constrained at | 0.5   | Check |
| PLAT300_ALERT_4_G | Atom Site Occupancy of C1S                     | Constrained at | 0.5   | Check |
| PLAT300_ALERT_4_G | Atom Site Occupancy of C2S                     | Constrained at | 0.5   | Check |
| PLAT300_ALERT_4_G | Atom Site Occupancy of H2SA                    | Constrained at | 0.5   | Check |
| PLAT300_ALERT_4_G | Atom Site Occupancy of H2SB                    | Constrained at | 0.5   | Check |
| PLAT300_ALERT_4_G | Atom Site Occupancy of H2SC                    | Constrained at | 0.5   | Check |
| PLAT300_ALERT_4_G | Atom Site Occupancy of N2S                     | Constrained at | 0.5   | Check |
| PLAT300_ALERT_4_G | Atom Site Occupancy of C3S                     | Constrained at | 0.5   | Check |
| PLAT300_ALERT_4_G | Atom Site Occupancy of C4S                     | Constrained at | 0.5   | Check |
| PLAT300_ALERT_4_G | Atom Site Occupancy of H4SA                    | Constrained at | 0.5   | Check |
| PLAT300_ALERT_4_G | Atom Site Occupancy of H4SB                    | Constrained at | 0.5   | Check |
| PLAT300_ALERT_4_G | Atom Site Occupancy of H4SC                    | Constrained at | 0.5   | Check |
| PLAT300_ALERT_4_G | Atom Site Occupancy of N3S                     | Constrained at | 0.5   | Check |
| PLAT300_ALERT_4_G | Atom Site Occupancy of C5S                     | Constrained at | 0.5   | Check |
| PLAT300_ALERT_4_G | Atom Site Occupancy of C6S                     | Constrained at | 0.5   | Check |
| PLAT300_ALERT_4_G | Atom Site Occupancy of H6SA                    | Constrained at | 0.5   | Check |
| PLAT300_ALERT_4_G | Atom Site Occupancy of H6SB                    | Constrained at | 0.5   | Check |
| PLAT300_ALERT_4_G | Atom Site Occupancy of H6SC                    | Constrained at | 0.5   | Check |
| PLAT300_ALERT_4_G | Atom Site Occupancy of N4S                     | Constrained at | 0.5   | Check |
| PLAT300_ALERT_4_G | Atom Site Occupancy of C7S                     | Constrained at | 0.5   | Check |
| PLAT300_ALERT_4_G | Atom Site Occupancy of C8S                     | Constrained at | 0.5   | Check |
| PLAT300_ALERT_4_G | Atom Site Occupancy of H8SA                    | Constrained at | 0.5   | Check |
| PLAT300_ALERT_4_G | Atom Site Occupancy of H8SB                    | Constrained at | 0.5   | Check |
| PLAT300_ALERT_4_G | Atom Site Occupancy of H8SC                    | Constrained at | 0.5   | Check |
| PLAT301_ALERT_3_G | Main Residue Disorder .....(Resd 1 )           |                | 4%    | Note  |
| PLAT302_ALERT_4_G | Anion/Solvent/Minor-Residue Disorder (Resd 4 ) |                | 100%  | Note  |
| PLAT302_ALERT_4_G | Anion/Solvent/Minor-Residue Disorder (Resd 5 ) |                | 100%  | Note  |
| PLAT302_ALERT_4_G | Anion/Solvent/Minor-Residue Disorder (Resd 6 ) |                | 100%  | Note  |
| PLAT302_ALERT_4_G | Anion/Solvent/Minor-Residue Disorder (Resd 7 ) |                | 100%  | Note  |
| PLAT413_ALERT_2_G | Short Inter XH3 .. XHn H6SA ..H22 .            |                | 2.09  | Ang.  |
|                   |                                                | x,y,z =        | 1_555 | Check |
| PLAT413_ALERT_2_G | Short Inter XH3 .. XHn H6SC ..H22 .            |                | 2.06  | Ang.  |
|                   |                                                | x,y,z =        | 1_555 | Check |
| PLAT432_ALERT_2_G | Short Inter X...Y Contact C6S ..C22            |                | 3.10  | Ang.  |
|                   |                                                | x,y,z =        | 1_555 | Check |
| PLAT720_ALERT_4_G | Number of Unusual/Non-Standard Labels .....    |                | 12    | Note  |
| PLAT721_ALERT_1_G | Bond Calc 0.98000, Rep 0.99760 Dev...          |                | 0.02  | Ang.  |
|                   | C2S -H2SA 1.555 1.555 .....                    | #              | 175   | Check |

|                                                                    |                           |              |                   |             |
|--------------------------------------------------------------------|---------------------------|--------------|-------------------|-------------|
| PLAT721_ALERT_1_G Bond                                             | Calc                      | 0.98000, Rep | 0.99850 Dev...    | 0.02 Ang.   |
| C2S                                                                | -H2SB                     | 1.555        | 1.555 .....       | # 176 Check |
| PLAT721_ALERT_1_G Bond                                             | Calc                      | 0.98000, Rep | 0.99820 Dev...    | 0.02 Ang.   |
| C2S                                                                | -H2SC                     | 1.555        | 1.555 .....       | # 177 Check |
| PLAT722_ALERT_1_G Angle                                            | Calc                      | 110.00, Rep  | 111.50 Dev...     | 1.50 Degree |
| C1S                                                                | -C2S                      | -H2SB        | 1.555 1.555 1.555 | # 318 Check |
| PLAT722_ALERT_1_G Angle                                            | Calc                      | 109.00, Rep  | 111.40 Dev...     | 2.40 Degree |
| C1S                                                                | -C2S                      | -H2SC        | 1.555 1.555 1.555 | # 319 Check |
| PLAT722_ALERT_1_G Angle                                            | Calc                      | 110.00, Rep  | 107.70 Dev...     | 2.30 Degree |
| H2SA                                                               | -C2S                      | -H2SB        | 1.555 1.555 1.555 | # 320 Check |
| PLAT722_ALERT_1_G Angle                                            | Calc                      | 109.00, Rep  | 107.50 Dev...     | 1.50 Degree |
| H2SA                                                               | -C2S                      | -H2SC        | 1.555 1.555 1.555 | # 321 Check |
| PLAT722_ALERT_1_G Angle                                            | Calc                      | 109.00, Rep  | 107.50 Dev...     | 1.50 Degree |
| H2SB                                                               | -C2S                      | -H2SC        | 1.555 1.555 1.555 | # 322 Check |
| PLAT789_ALERT_4_G Atoms with Negative                              | _atom_site_disorder_group | #            | 6                 | Check       |
| PLAT794_ALERT_5_G Tentative Bond Valency for Fe1                   | (III)                     | .            | 3.75              | Info        |
| PLAT860_ALERT_3_G Number of Least-Squares Restraints               | .....                     |              | 112               | Note        |
| PLAT913_ALERT_3_G Missing # of Very Strong Reflections in FCF      | ....                      |              | 1                 | Note        |
| PLAT960_ALERT_3_G Number of Intensities with I < - 2*sig(I)        | ...                       |              | 43                | Check       |
| PLAT978_ALERT_2_G Number C-C Bonds with Positive Residual Density. |                           |              | 1                 | Info        |

---

1 **ALERT level A** = Most likely a serious problem - resolve or explain  
 3 **ALERT level B** = A potentially serious problem, consider carefully  
 45 **ALERT level C** = Check. Ensure it is not caused by an omission or oversight  
 86 **ALERT level G** = General information/check it is not something unexpected

16 ALERT type 1 CIF construction/syntax error, inconsistent or missing data  
 33 ALERT type 2 Indicator that the structure model may be wrong or deficient  
 14 ALERT type 3 Indicator that the structure quality may be low  
 71 ALERT type 4 Improvement, methodology, query or suggestion  
 1 ALERT type 5 Informative message, check

---

It is advisable to attempt to resolve as many as possible of the alerts in all categories. Often the minor alerts point to easily fixed oversights, errors and omissions in your CIF or refinement strategy, so attention to these fine details can be worthwhile. In order to resolve some of the more serious problems it may be necessary to carry out additional measurements or structure refinements. However, the purpose of your study may justify the reported deviations and the more serious of these should normally be commented upon in the discussion or experimental section of a paper or in the "special\_details" fields of the CIF. checkCIF was carefully designed to identify outliers and unusual parameters, but every test has its limitations and alerts that are not important in a particular case may appear. Conversely, the absence of alerts does not guarantee there are no aspects of the results needing attention. It is up to the individual to critically assess their own results and, if necessary, seek expert advice.

### **Publication of your CIF in IUCr journals**

A basic structural check has been run on your CIF. These basic checks will be run on all CIFs submitted for publication in IUCr journals (*Acta Crystallographica*, *Journal of Applied Crystallography*, *Journal of Synchrotron Radiation*); however, if you intend to submit to *Acta Crystallographica Section C* or *E* or *IUCrData*, you should make sure that full publication checks are run on the final version of your CIF prior to submission.

### **Publication of your CIF in other journals**

Please refer to the *Notes for Authors* of the relevant journal for any special instructions relating to CIF submission.
